# Supplementary material for: Die Milieukoalition des Rechtspopulismus. Kombinationen politischer Einstellungen innerhalb des potenziellen Elektorats der AfD
Source: Springer Nature journal article supplement (doi:10.1007/s11609-023-00507-y), 2023-11-22
Supplement: MOESM1 [file 26346770]

# Online-Anhang Abbildungen

Florian Buchmayr

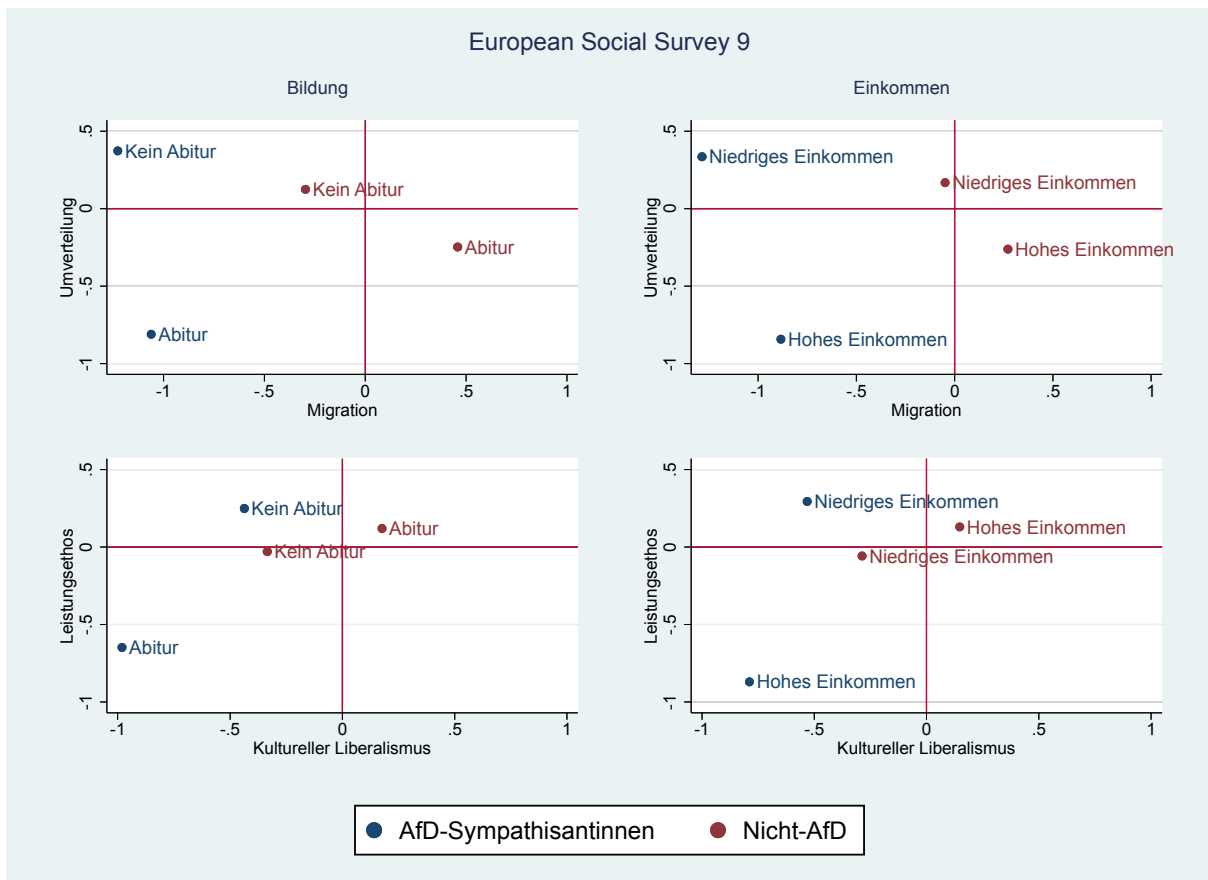

**Abb. 7** Verortung in zweidimensionalen politischen Räumen von Personen mit und ohne Affinitäten zur AfD für unterschiedliche Einkommens- und Bildungsklassen (Quelle: Eigene Berechnungen mit Daten des ESS 9)

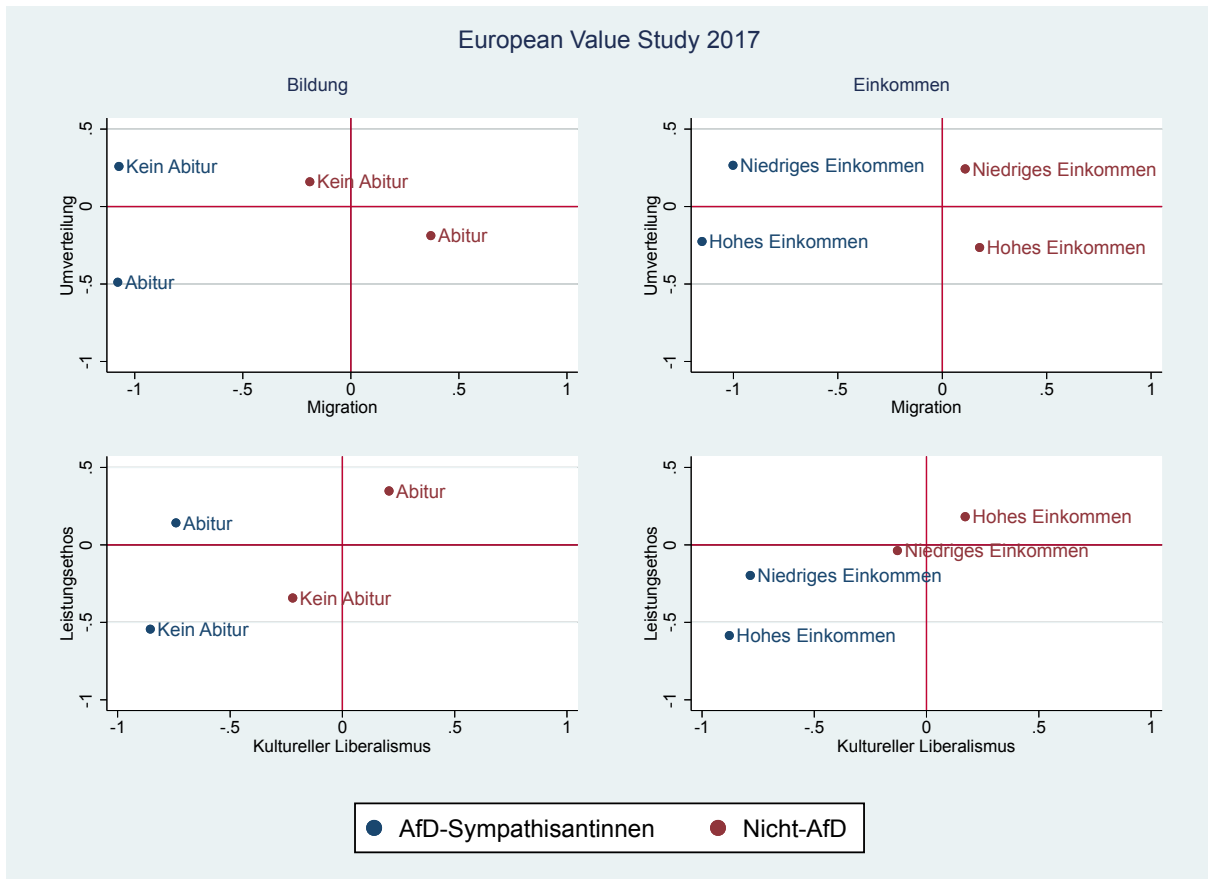

**Abb. 8** Verortung in zweidimensionalen politischen Räumen von Personen mit und ohne Affinitäten zur AfD für unterschiedliche Einkommens- und Bildungsklassen (Quelle: Eigene Berechnungen mit Daten des ESS 9)

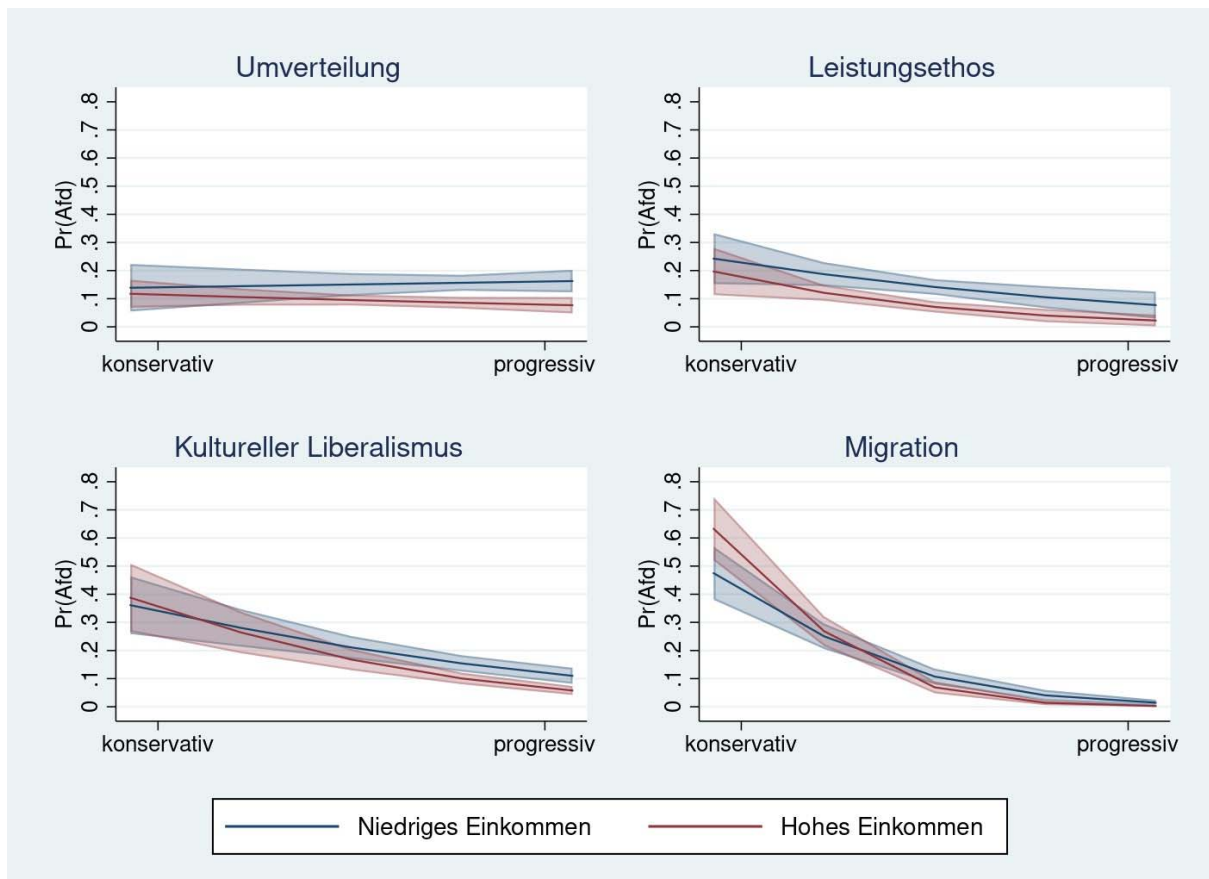

**Abb. 9** Vorhergesagte Wahrscheinlichkeiten für AfD-Sympathie für unterschiedliche Einkommensklassen für vier unterschiedliche Einstellungsdimensionen (Quelle: Eigene Berechnungen mit Daten des ALLBUS 2018; für detaillierte Ergebnisse siehe Tabelle 4 im Online-Anhang)

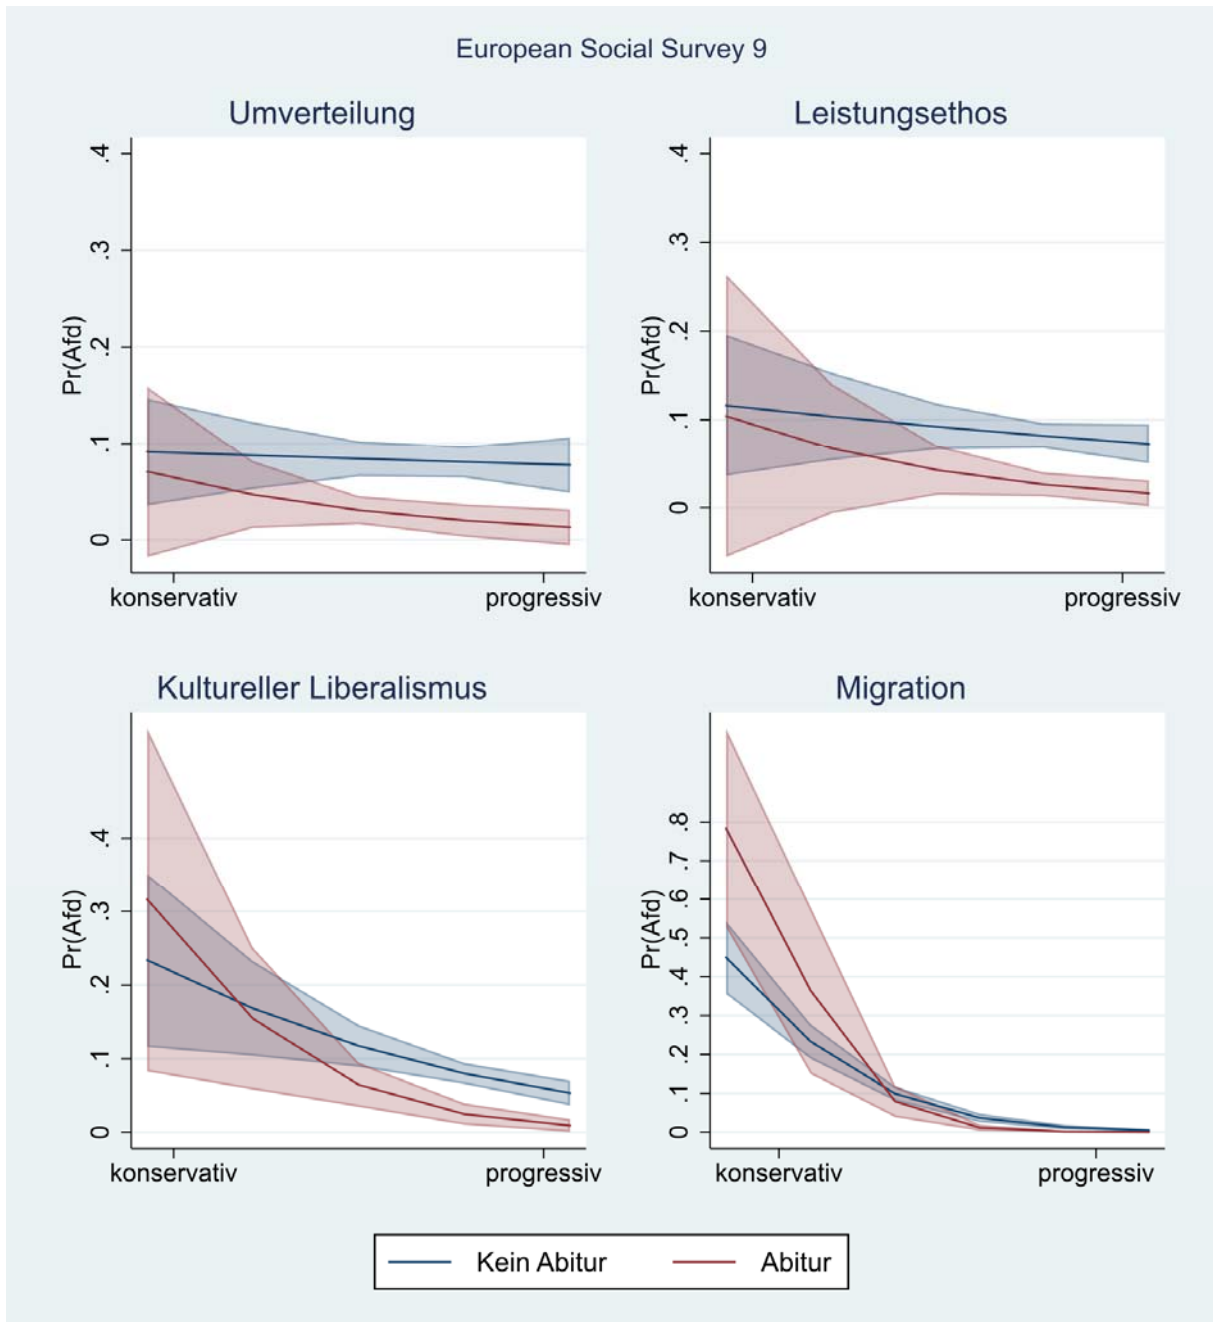

**Abb. 10** Vorhergesagte Wahrscheinlichkeiten für AfD-Sympathie für unterschiedliche Bildungsklassen für vier unterschiedliche Einstellungsdimensionen (Quelle: Eigene Berechnungen mit Daten des ESS 9; für detaillierte Ergebnisse siehe Tabelle 3 im Online-Anhang)

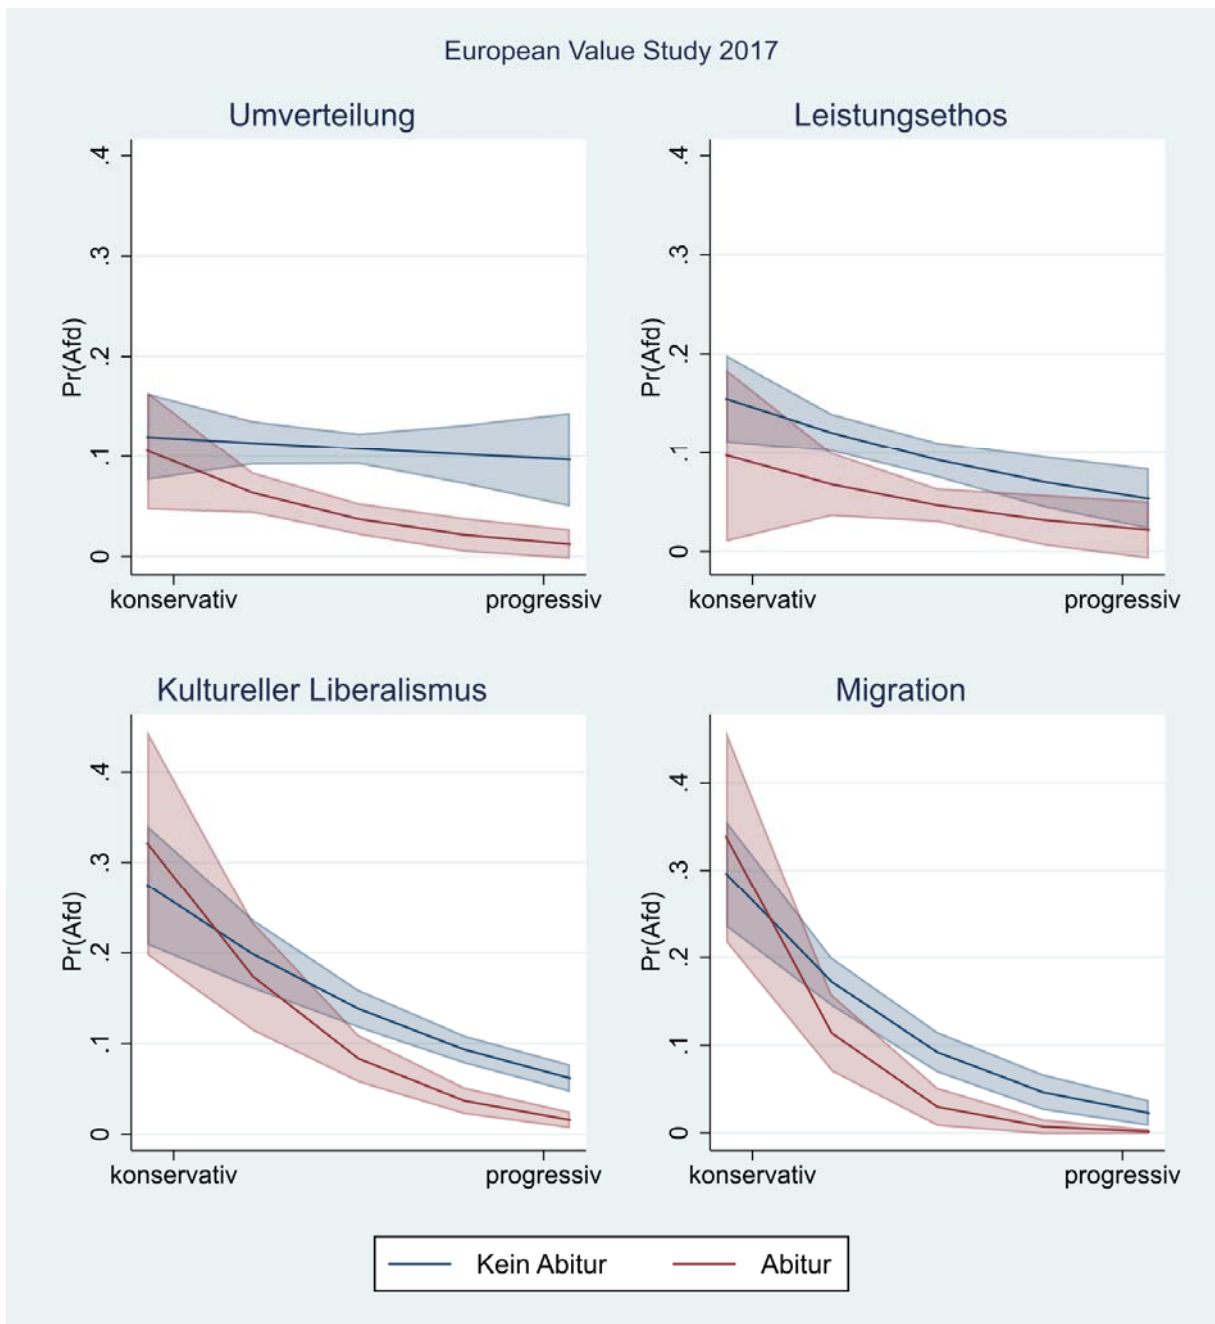

**Abb. 11** Vorhergesagte Wahrscheinlichkeiten für AfD-Sympathie für unterschiedliche Bildungsklassen für vier unterschiedliche Einstellungsdimensionen. (Quelle: Eigene Berechnungen mit Daten der EVS 2017; für detaillierte Ergebnisse siehe Tabelle 3 im Online-Anhang)

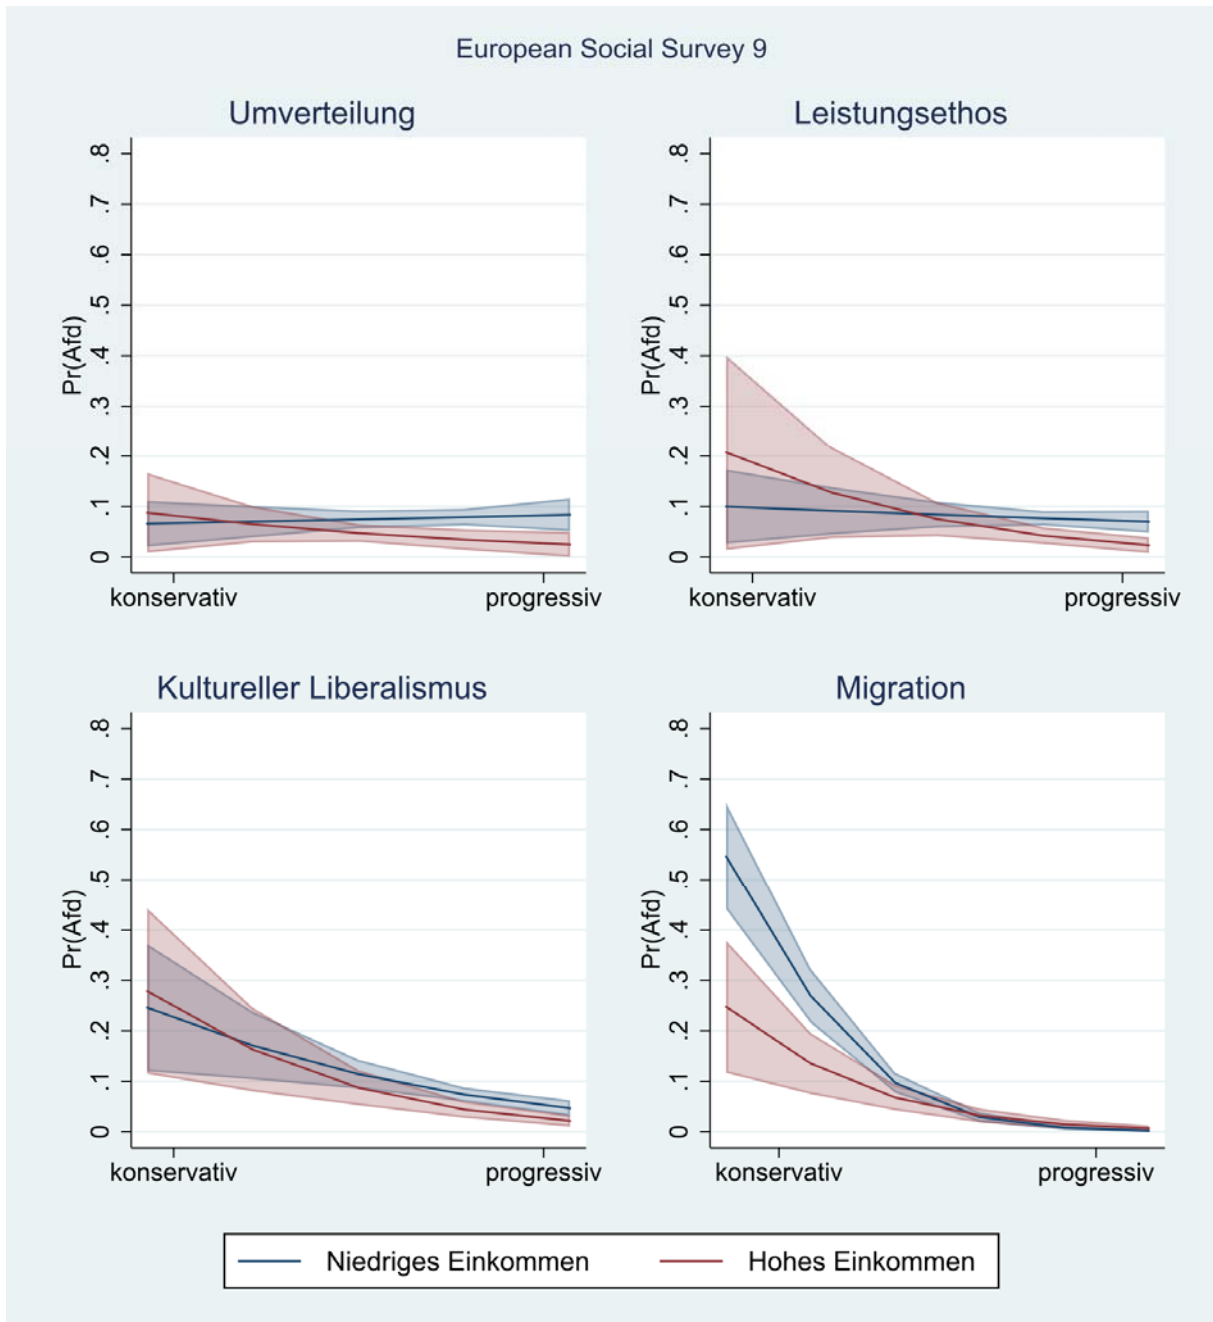

**Abb. 12** Vorhergesagte Wahrscheinlichkeiten für AfD-Sympathie für unterschiedliche Einkommensklassen für vier unterschiedliche Einstellungsdimensionen (Quelle: Eigene Berechnungen mit Daten des ESS 9; für detaillierte Ergebnisse siehe Tabelle 4 im Online-Anhang)

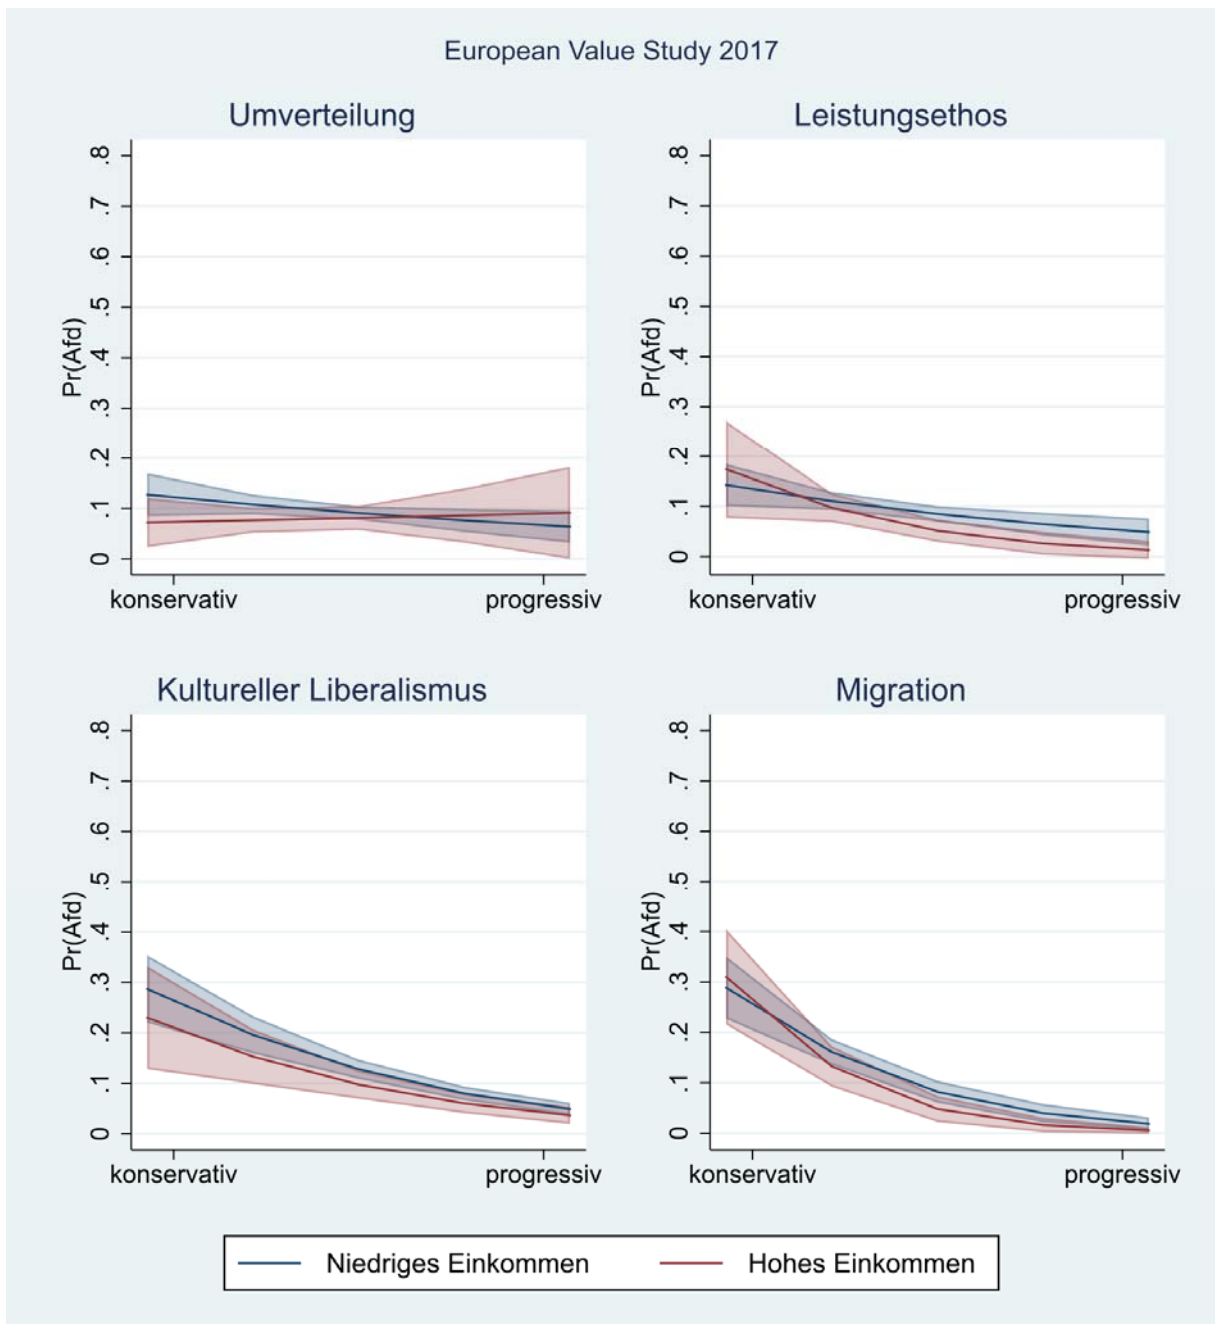

**Abb. 13** Vorhergesagte Wahrscheinlichkeiten für AfD-Sympathie für unterschiedliche Einkommensklassen für vier unterschiedliche Einstellungsdimensionen (Quelle: Eigene Berechnungen mit Daten der EVS 2017; für detaillierte Ergebnisse siehe Tabelle 4 im Online-Anhang)

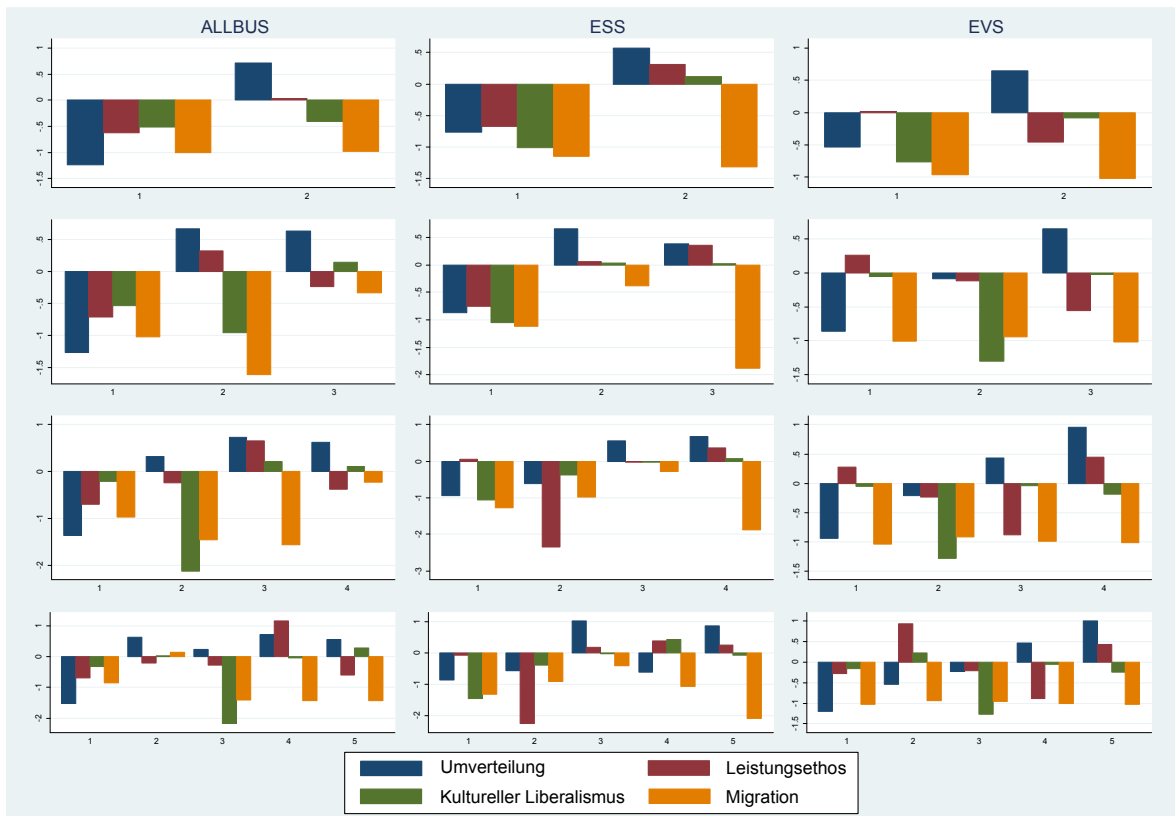

**Abb. 14** 2- bis 5-Clusterlösungen. Finale Zuordnung der Clusterzugehörigkeiten durch das K-Means-Verfahren (Quelle: Eigene Berechnungen mit Daten des ALLBUS 2018, des ESS 9 und der EVS 2017)



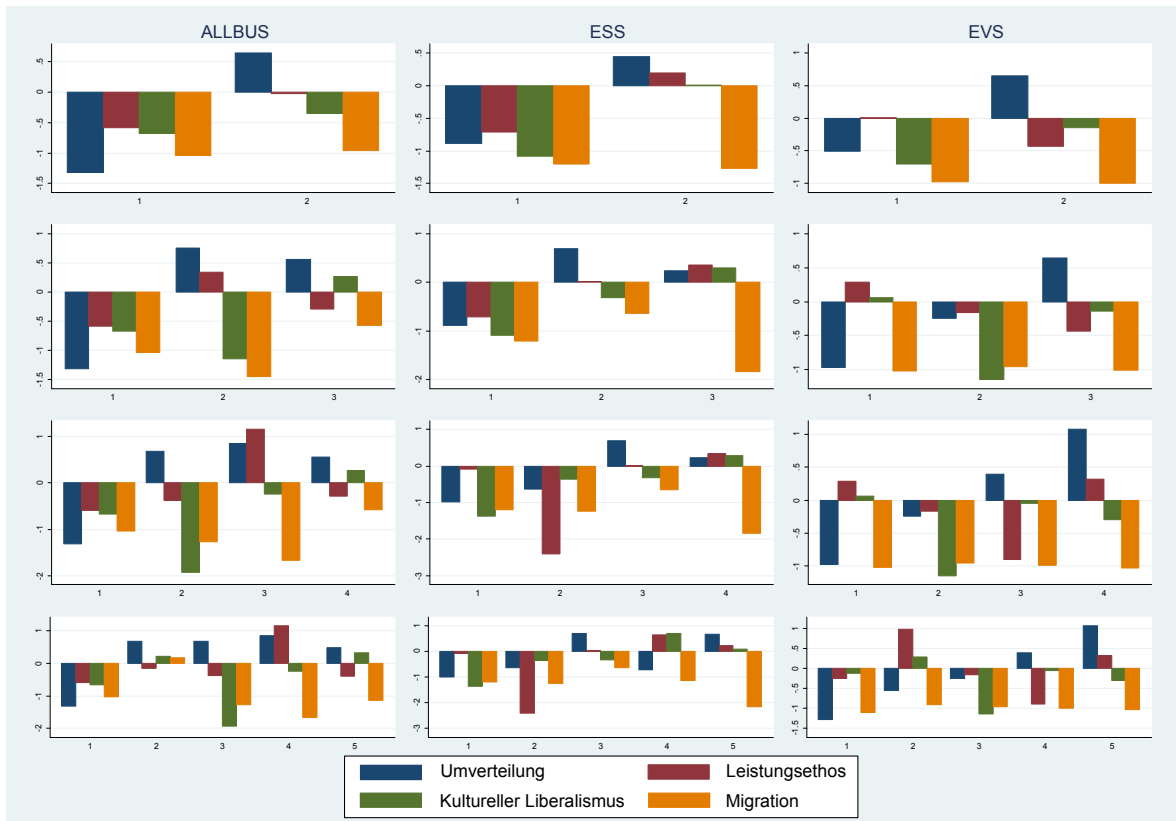

**Abb. 15** 2- bis 5-Clusterlösungen mit dem Ward-Verfahren (Quelle: Eigene Berechnungen mit Daten des ALLBUS 2018, des ESS 9 und der EVS 2017)

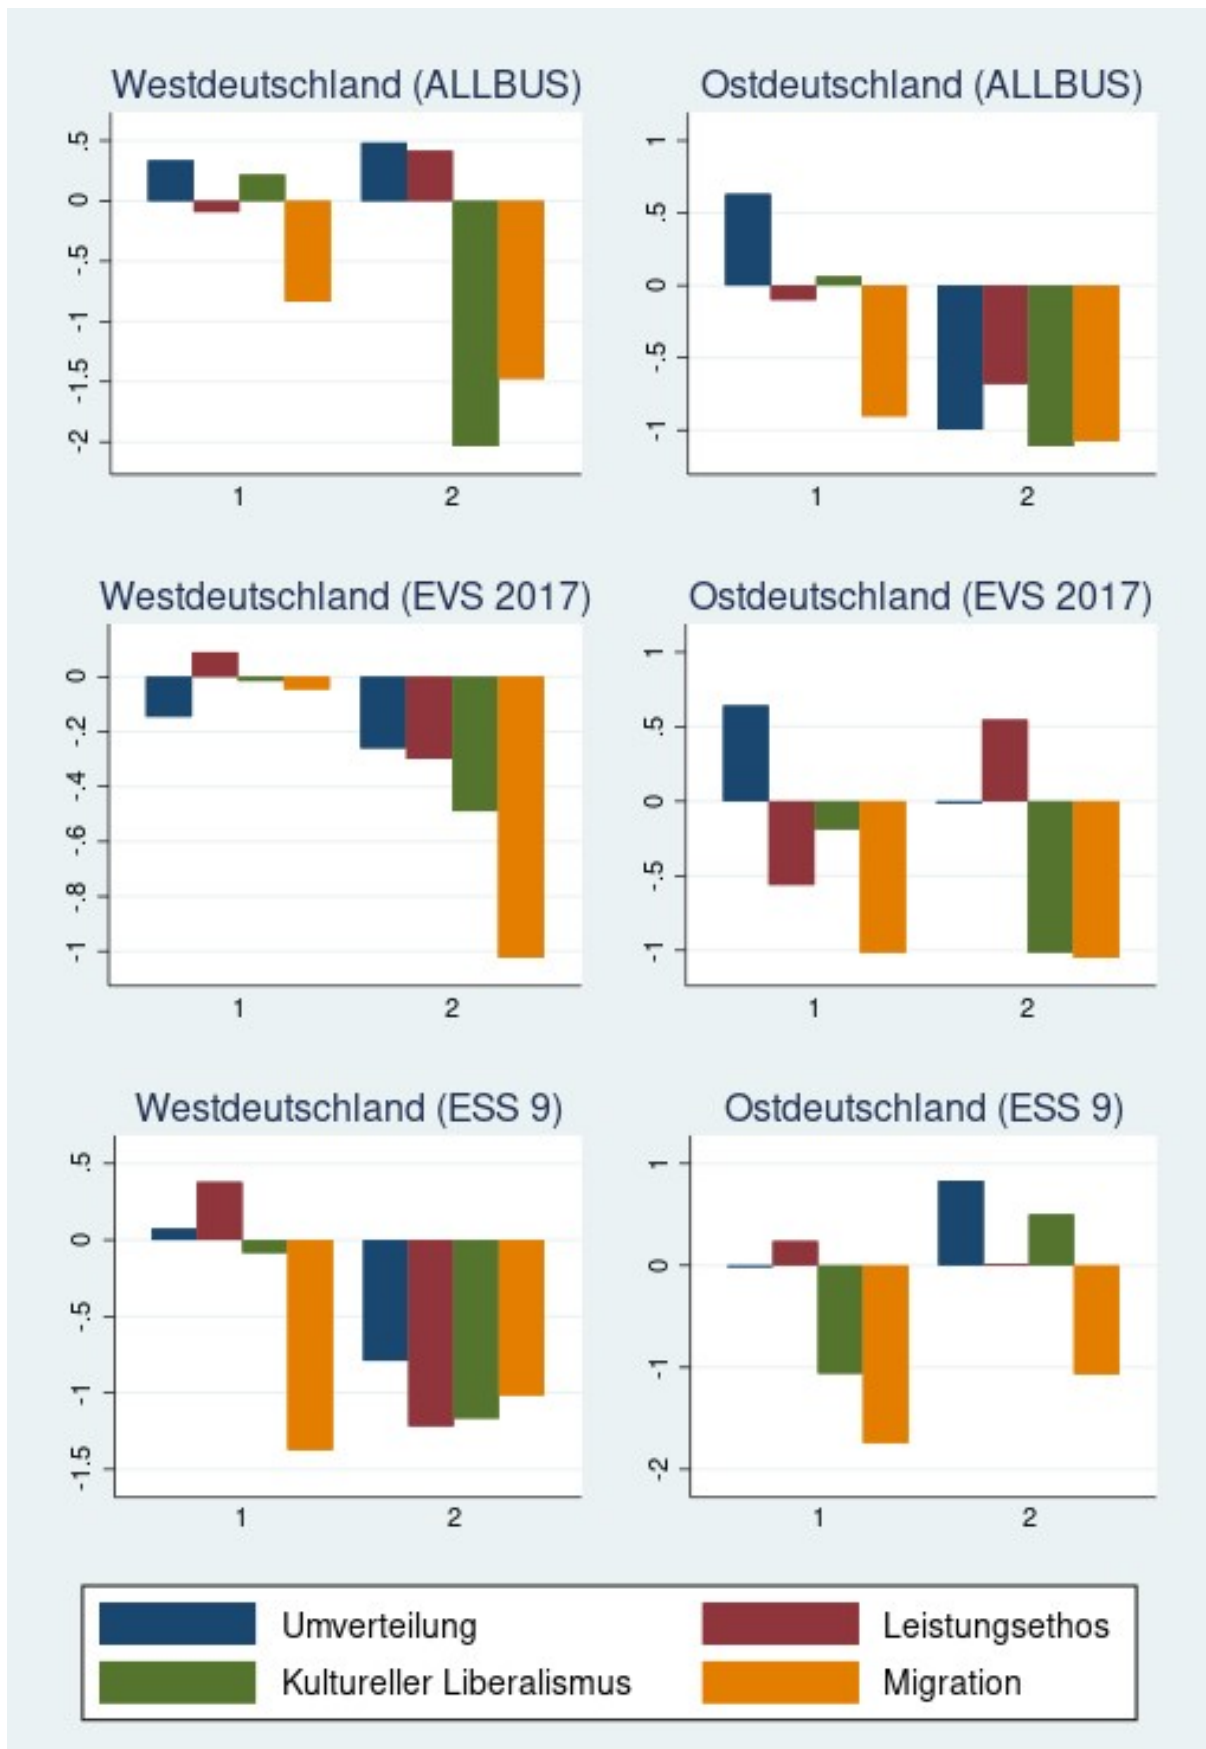

**Abb. 16** Clusteranalysen separat für West- und Ostdeutschland. Abweichungen vom Gesamtmittelwert (Quelle: Eigene Berechnungen mit Daten des ALLBUS 2018, des ESS 9 und der EVS 2017)

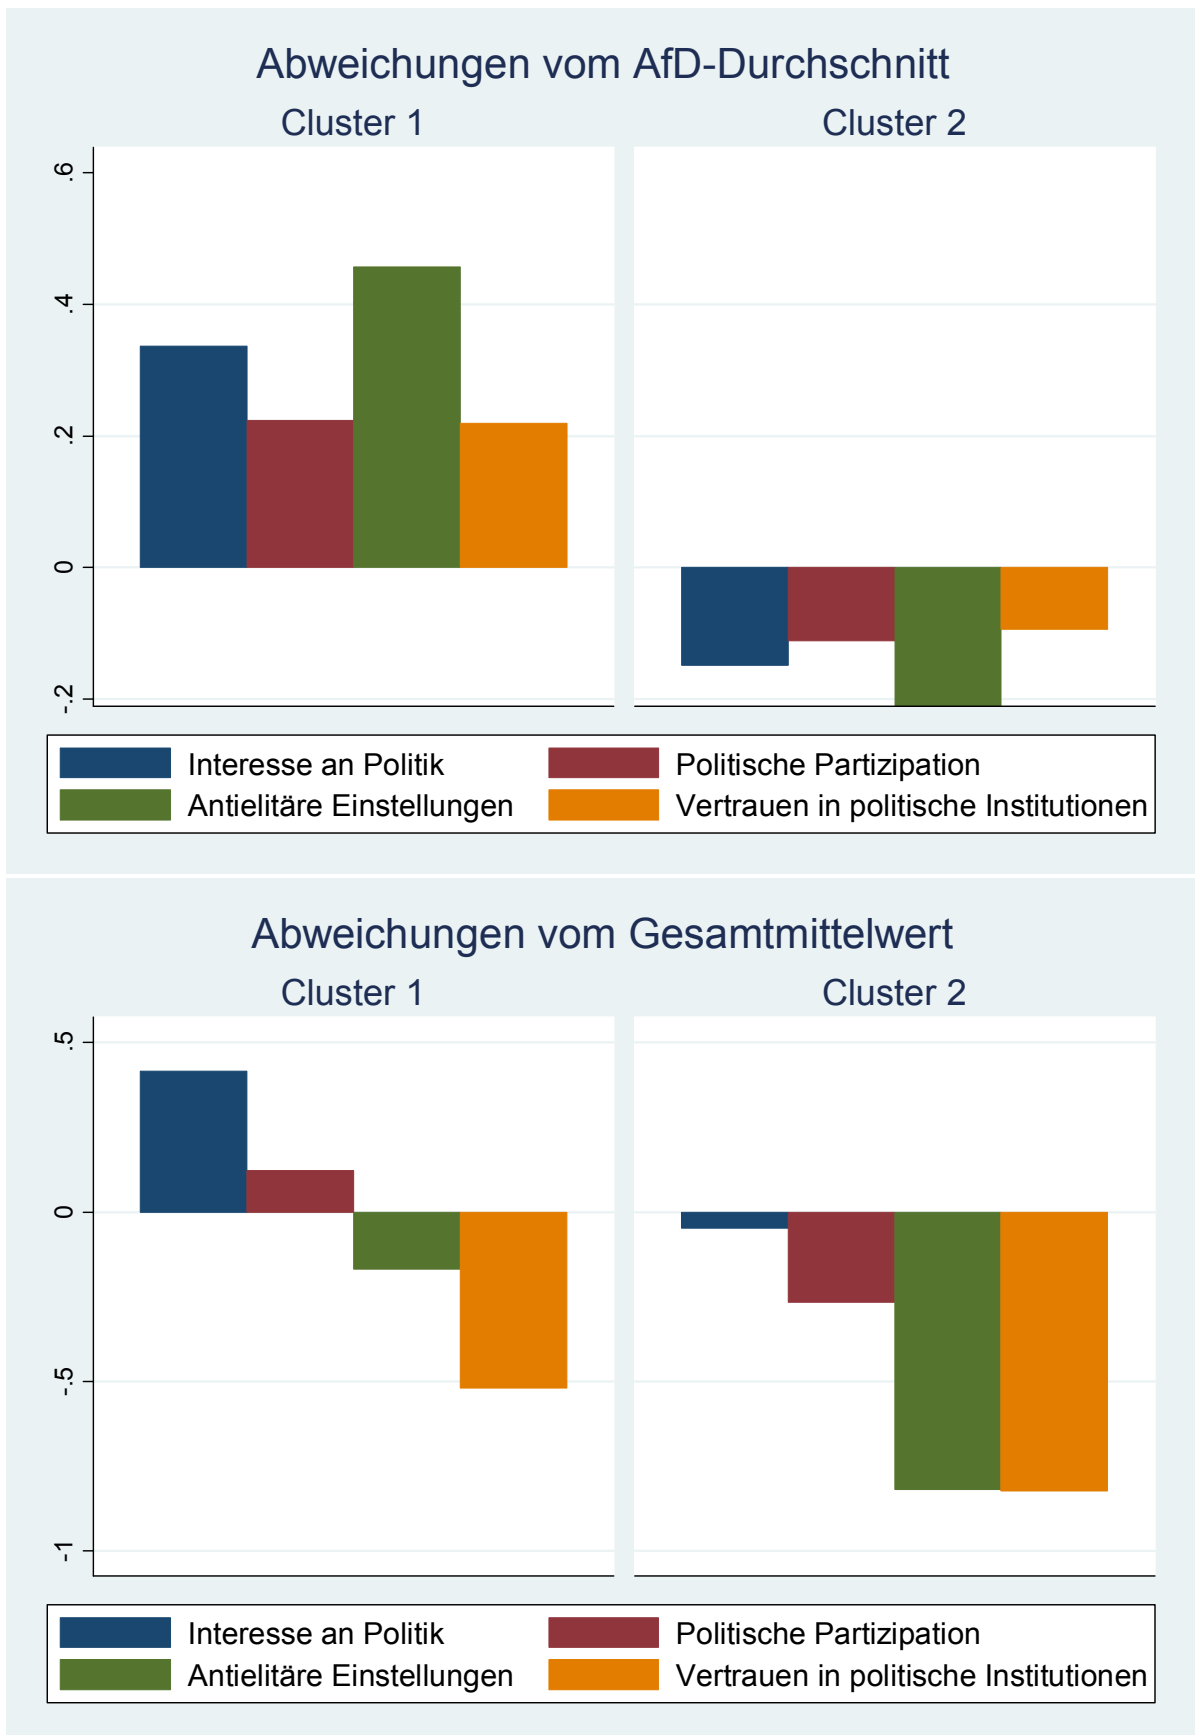

**Abb. 17** Verhältnis zum politischen System (Quelle: Eigene Berechnungen mit Daten des ALLBUS 2018; hohe Werte zeigen überdurchschnittlich linke und niedrige Werte rechte Einstellungen an)

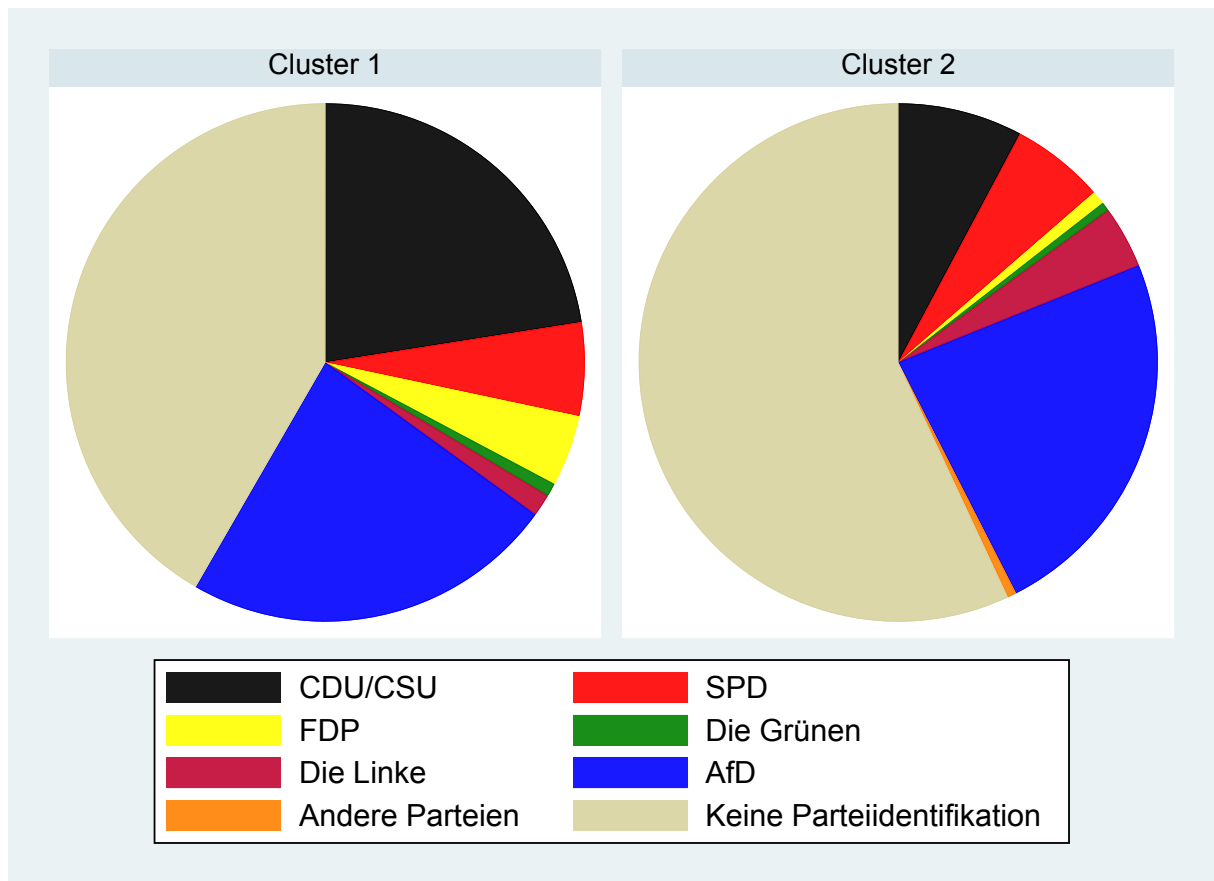

**Abb. 18** Identifikation mit Parteien von Personen, die mit der AfD sympathisieren. Vergleich von Cluster 1 und Cluster 2 (Quelle: Eigene Berechnungen mit Daten des ALLBUS 2018)

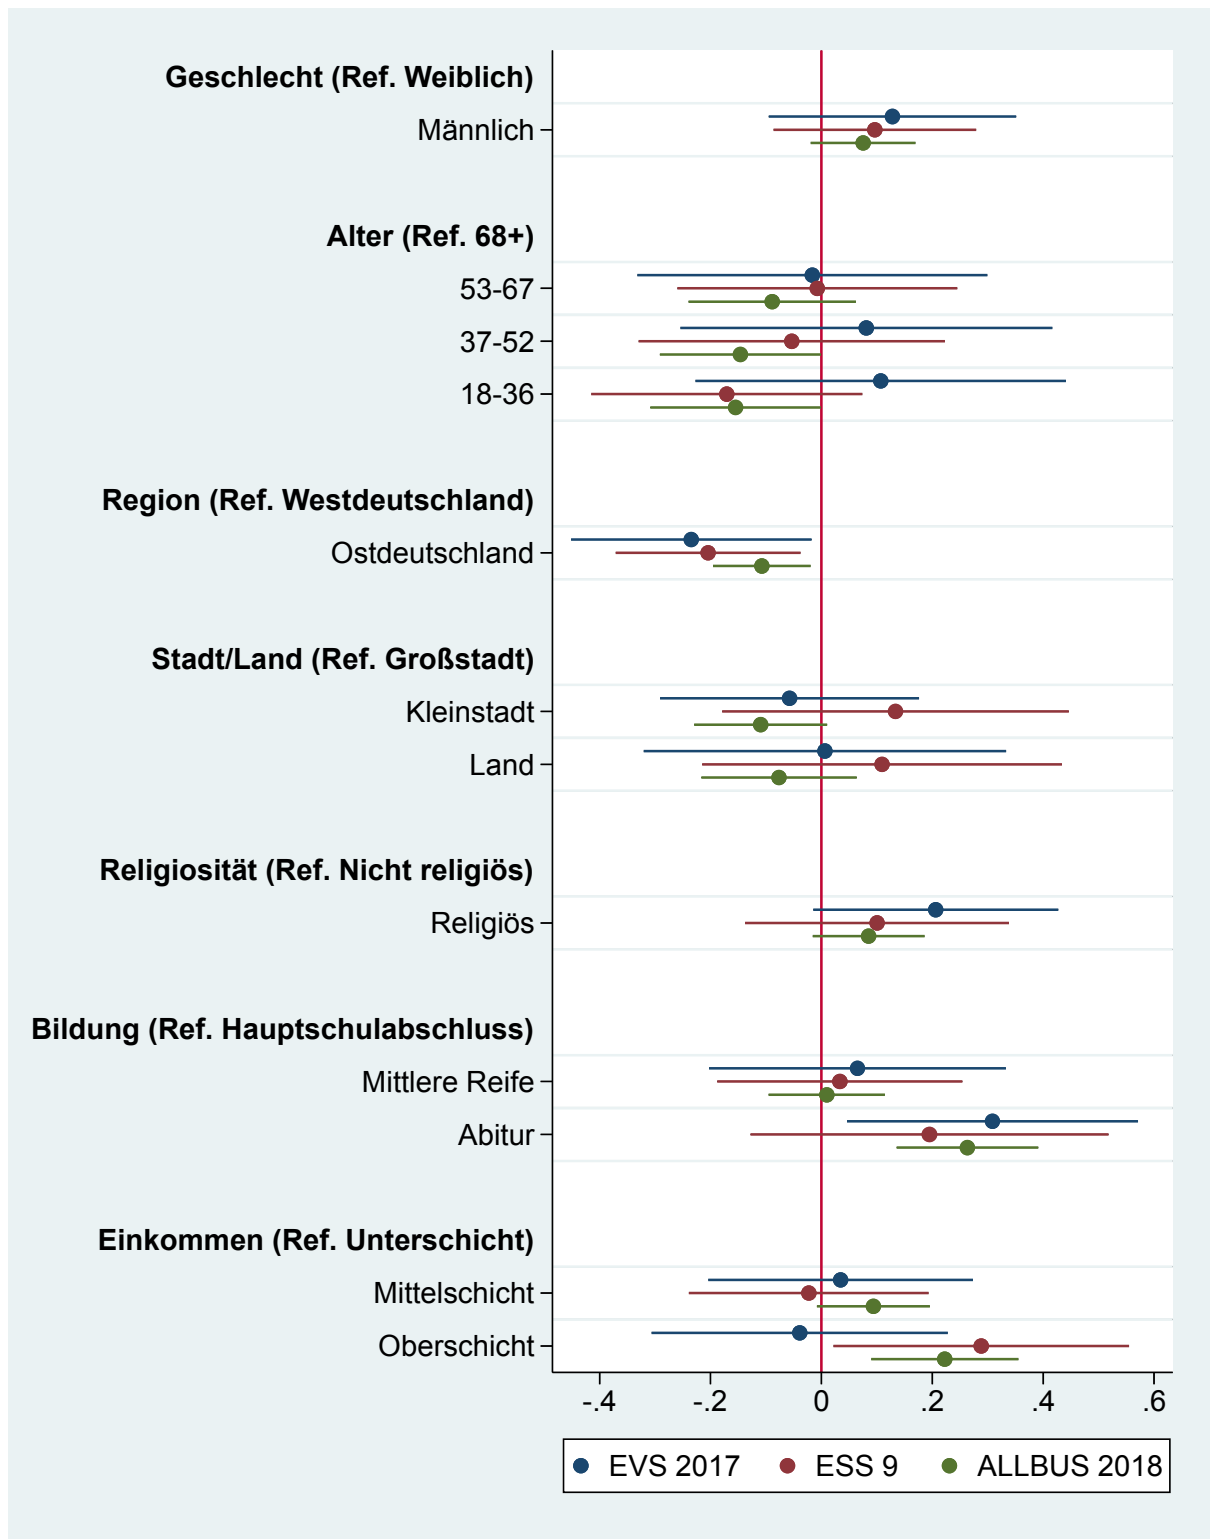

**Abb. 19** Koeffizientenplot der logistischen Regressionen mit Clusterzugehörigkeiten als abhängiger Variable. Referenzgruppe stellen Angehörige von Cluster 2 dar (Quelle: Eigene Berechnungen basierend auf Daten des ALLBUS 2018, des ESS 9 und der EVS 2017; marginale Effekte)

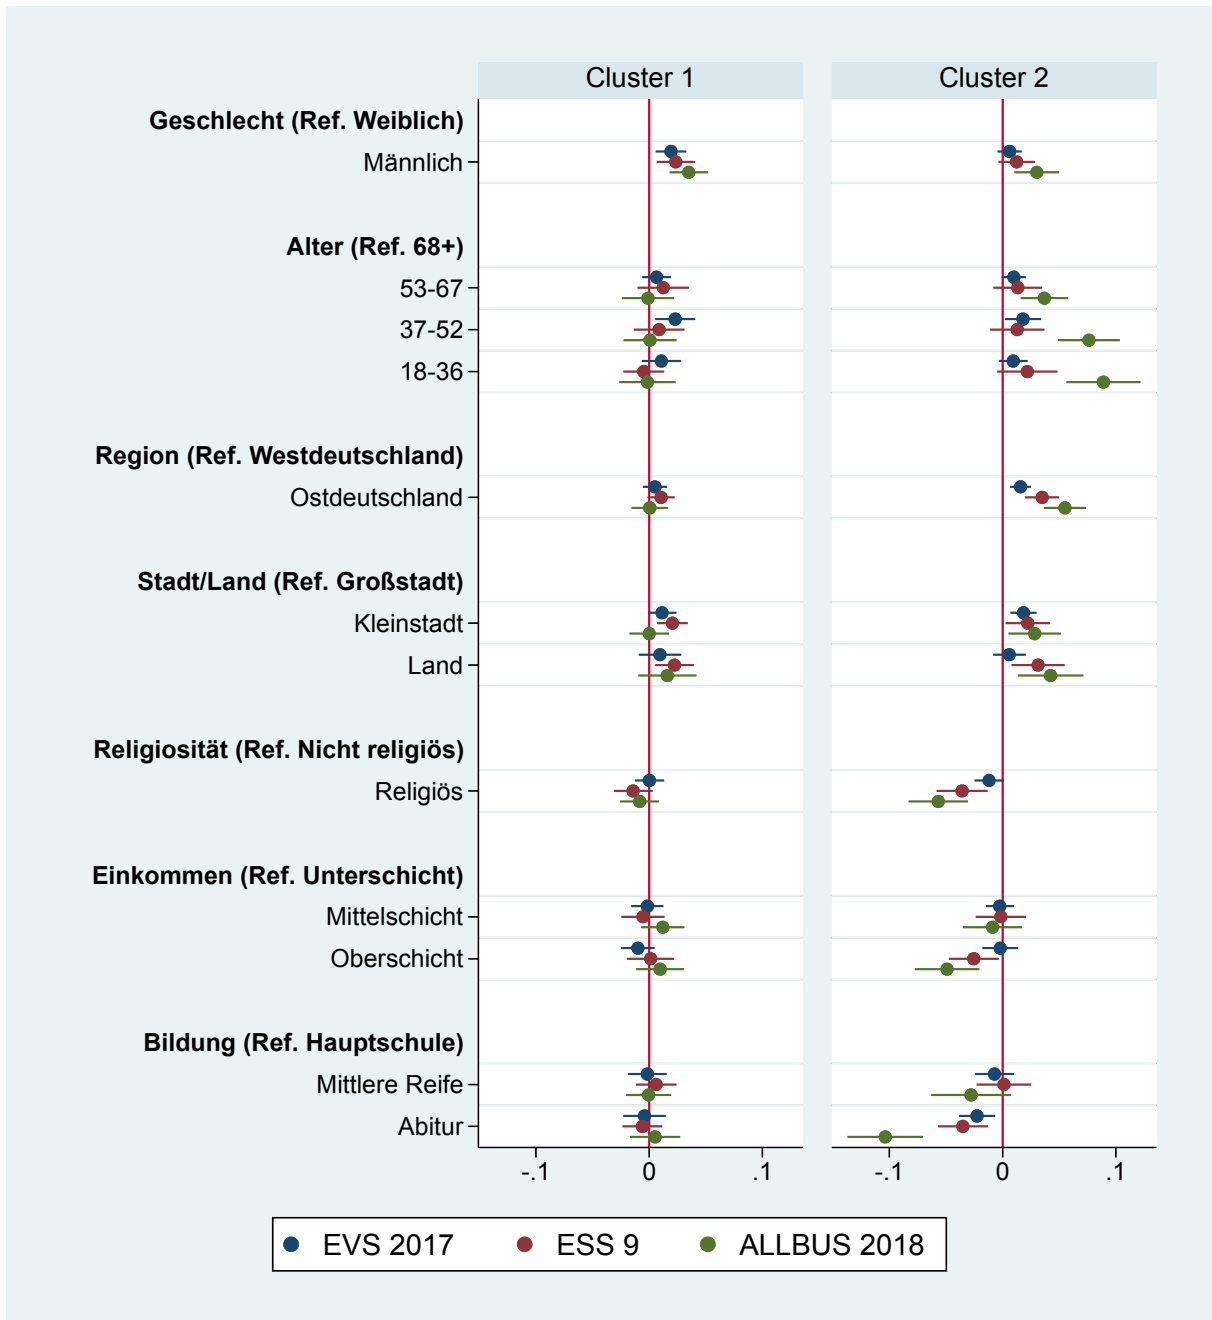

**Abb. 20** Koeffizientenplot der multinomialen logistischen Regressionen. Referenzgruppen sind jeweils Nicht-AfD-Sympathisantinnen (Quelle: Eigene Berechnungen basierend auf Daten des ALLBUS 2018, des ESS 9 und der EVS 2017; marginale Effekte)
