# Supplementary material for: Die Milieukoalition des Rechtspopulismus. Kombinationen politischer Einstellungen innerhalb des potenziellen Elektorats der AfD
Source: Springer Nature journal article supplement (doi:10.1007/s11609-023-00507-y), 2023-11-22
Supplement: MOESM2 [file 26346770]

# Online-Anhang Tabellen

Florian Buchmayr

**Tab. 2** Übersicht über die Items zur Messung der vier Einstellungsdimensionen (Quelle: ALLBUS 2018, ESS 9, EVS 2017. In Klammern wird das Skalenniveau für die jeweiligen Items angegeben)

|                                                           | ALLBUS 2018                                                                                                                                                                                                                                                                                                                                                                           | EVS 2017                                                                                                                                                                                                                                                                                                                                                                                                                                          | ESS 9                                                                                                                                                                                                                                                                                                                                                              |
|-----------------------------------------------------------|---------------------------------------------------------------------------------------------------------------------------------------------------------------------------------------------------------------------------------------------------------------------------------------------------------------------------------------------------------------------------------------|---------------------------------------------------------------------------------------------------------------------------------------------------------------------------------------------------------------------------------------------------------------------------------------------------------------------------------------------------------------------------------------------------------------------------------------------------|--------------------------------------------------------------------------------------------------------------------------------------------------------------------------------------------------------------------------------------------------------------------------------------------------------------------------------------------------------------------|
| <b>1. Kulturelle Dimension (Migration)</b>                | <p>1) Ergeben sich da Ihrer Meinung nach in den folgenden Bereichen wegen der Flüchtlinge mehr Chancen, mehr Risiken oder weder noch? – In Bezug auf die wirtschaftliche Lage in Deutschland (5)</p> <p>2) Einwanderer sind gut für die deutsche Wirtschaft. (5)</p> <p>3) Der Zuzug von Flüchtlingen nach Deutschland sollte unterbunden werden. (5)</p> <p>Cronbach Alpha: 0.72</p> | <p>1) Ausländer verschärfen die Kriminalitätsprobleme (10)</p> <p>2) Ausländer belasten das Sozialsystem eines Landes (10)</p> <p>Cronbach Alpha: 0.85</p>                                                                                                                                                                                                                                                                                        | <p>1) Zuwanderung schlecht für die Wirtschaft (10)</p> <p>2) Zuwanderung bereichert das kulturelle Leben (10)</p> <p>3) Deutschland wird durch Zuwanderung zu einem besseren Ort (10)</p> <p>Cronbach Alpha: 0.81</p>                                                                                                                                              |
| <b>2. Kulturelle Dimension (Kultureller Liberalismus)</b> | <p>1) Gleichgeschlechtliche Ehen sollten gesetzlich verboten sein. (5)</p>                                                                                                                                                                                                                                                                                                            | <p>1) Ist dies unter keinen Umständen in Ordnung, in jedem Fall in Ordnung oder irgendwas dazwischen? - Homosexualität (10)</p> <p>2) Gleichgeschlechtliche Paare sind genauso gute Eltern wie andere Paare. (5)</p> <p>Cronbach Alpha: 0.61</p>                                                                                                                                                                                                  | <p>1) Schwule und Lesben sollten ihr Leben so führen dürfen, wie sie es wollen. (5)</p> <p>2) Wenn ein nahes Familienmitglied schwul oder lesbisch wäre, würde ich mich schämen. (5)</p> <p>3) Schwule und lesbische Paare sollten die gleichen Rechte haben, Kinder zu adoptieren, wie Paare, die aus Mann und Frau bestehen. (5)</p> <p>Cronbach Alpha: 0.74</p> |
| <b>1. Ökonomische Dimension (Umverteilung)</b>            | <p>1) Einkommen und Wohlstand sollten zu Gunsten der einfachen Leute umverteilt werden. (5)</p>                                                                                                                                                                                                                                                                                       | <p>1) Große Einkommensunterschiede zwischen den Bürgerinnen und Bürgern beseitigen (4)</p> <p>2) Der Staat besteuert die Reichen und unterstützt die Armen. - In keinem Fall ein notwendiger Bestandteil einer Demokratie (10)</p> <p>3) Der Staat sorgt für Gleichheit der Einkommen. - In keinem Fall ein notwendiger Bestandteil einer Demokratie (10)</p> <p>Cronbach Alpha: 0.50</p>                                                         | <p>1) Der Staat sollte Maßnahmen ergreifen, um Einkommensunterschiede zu verringern. (5)</p> <p>2) Eine Gesellschaft ist gerecht, wenn Einkommen und Vermögen gleichmäßig auf alle Menschen verteilt sind. (5)</p> <p>Cronbach Alpha: 0.52</p>                                                                                                                     |
| <b>2. Ökonomische Dimension (Leistungsethos)</b>          | <p>1) Nur wenn die Unterschiede im Einkommen und im sozialen Ansehen groß genug sind, gibt es auch einen Anreiz für persönliche Leistungen. (4)</p> <p>2) Die Rangunterschiede zwischen den Menschen sind akzeptabel, weil sie im Wesentlichen ausdrücken, was man aus den Chancen, die man hatte, gemacht hat. (4)</p> <p>Cronbach Alpha: 0.69</p>                                   | <p>1) Es ist demütigend, Geld zu erhalten, ohne dass man dafür arbeiten muss. (5)</p> <p>2) Menschen, die nicht arbeiten, werden faul. (5)</p> <p>3) Arbeit ist eine Verpflichtung gegenüber der Gesellschaft. (5)</p> <p>4) Die Arbeit sollte immer an erster Stelle stehen, auch wenn das weniger Freizeit bedeutet. (5)</p> <p>5) Man braucht eine Arbeit, um seine Fähigkeiten voll entwickeln zu können. (5)</p> <p>Cronbach Alpha: 0.69</p> | <p>1) Eine Gesellschaft ist gerecht, wenn sie sich um Arme und Bedürftige kümmert, unabhängig davon, was diese der Gesellschaft zurückgeben. (5)</p>                                                                                                                                                                                                               |

**Tab. 3** Interaktionen zwischen Einstellungsdimensionen und Bildungsklassen unter Kontrolle von Geschlecht, Alter, Religiosität, Stadt/Land und Region (Quelle: ALLBUS 2018, ESS 9, EVS 2017; eigene Berechnungen)

| VARIABLES                  | M1<br>ALLBUS         | M1<br>ESS            | M1<br>EVS            | M2<br>ALLBUS         | M2<br>ESS            | M2<br>EVS            | M3<br>ALLBUS          | M3<br>ESS            | M3<br>EVS             | M4<br>ALLBUS          | M4<br>ESS             | M4<br>EVS            |
|----------------------------|----------------------|----------------------|----------------------|----------------------|----------------------|----------------------|-----------------------|----------------------|-----------------------|-----------------------|-----------------------|----------------------|
| Umverteilung               | 0.134**<br>(0.0650)  | -0.0463<br>(0.134)   | -0.0622<br>(0.120)   |                      |                      |                      |                       |                      |                       |                       |                       |                      |
| Umverteilung*<br>Bildung   | -0.393***<br>(0.116) | -0.406<br>(0.374)    | -0.509**<br>(0.250)  |                      |                      |                      |                       |                      |                       |                       |                       |                      |
| Leistungsethos             |                      |                      |                      | -0.0940<br>(0.0979)  | -0.135<br>(0.138)    | -0.306***<br>(0.117) |                       |                      |                       |                       |                       |                      |
| Leistungsethos*<br>Bildung |                      |                      |                      | -1.058***<br>(0.186) | -0.364<br>(0.341)    | -0.100<br>(0.320)    |                       |                      |                       |                       |                       |                      |
| Kult. Lib.                 |                      |                      |                      |                      |                      |                      | -0.375***<br>(0.0494) | -0.451***<br>(0.127) | -0.464***<br>(0.0678) |                       |                       |                      |
| Kult. Lib*<br>Bildung      |                      |                      |                      |                      |                      |                      | -0.308***<br>(0.0920) | -0.578**<br>(0.268)  | -0.420***<br>(0.143)  |                       |                       |                      |
| Migration                  |                      |                      |                      |                      |                      |                      |                       |                      |                       | -1.245***<br>(0.0905) | -0.549***<br>(0.0521) | -0.748***<br>(0.112) |
| Migration*<br>Bildung      |                      |                      |                      |                      |                      |                      |                       |                      |                       | -0.594***<br>(0.172)  | -0.479***<br>(0.181)  | -0.713**<br>(0.283)  |
| Constant                   | -3.621***<br>(0.397) | -3.336***<br>(0.700) | -3.079***<br>(0.440) | -2.905***<br>(0.355) | -2.980***<br>(0.867) | -2.702***<br>(0.400) | -1.535***<br>(0.353)  | -2.021***<br>(0.772) | -1.815***<br>(0.396)  | 0.0419<br>(0.368)     | -1.032*<br>(0.582)    | -1.174***<br>(0.423) |
| Observations               | 3,073                | 2,242                | 3,077                | 3,106                | 2,233                | 2,655                | 3,074                 | 2,241                | 2,605                 | 3,110                 | 2,243                 | 2,259                |

Robust standard errors in parentheses; \*\*\* p<0.01, \*\* p<0.05, \* p<0.1

**Tab. 4** Interaktionen zwischen Einstellungsdimensionen und Einkommensklassen unter Kontrolle von Geschlecht, Alter, Religiosität, Stadt/Land und Region (Quelle: ALLBUS 2018, ESS 9, EVS 2017; eigene Berechnungen)

| VARIABLES                              | M1<br>ALLBUS         | M1<br>ESS            | M1<br>EVS            | M2<br>ALLBUS         | M2<br>ESS            | M2<br>EVS            | M3<br>ALLBUS          | M3<br>ESS           | M3<br>EVS            | M4<br>ALLBUS         | M4<br>ESS             | M4<br>EVS            |
|----------------------------------------|----------------------|----------------------|----------------------|----------------------|----------------------|----------------------|-----------------------|---------------------|----------------------|----------------------|-----------------------|----------------------|
| Umverteilung                           | 0.0135<br>(0.119)    | -0.00906<br>(0.280)  | -0.00646<br>(0.191)  |                      |                      |                      |                       |                     |                      |                      |                       |                      |
| Umverteilung*<br>Hohes Einkommen       | -0.150<br>(0.156)    | -0.406<br>(0.369)    | 0.0715<br>(0.310)    |                      |                      |                      |                       |                     |                      |                      |                       |                      |
| Leistungsethos                         |                      |                      |                      | -0.331**<br>(0.151)  | -0.0189<br>(0.248)   | -0.0634<br>(0.194)   |                       |                     |                      |                      |                       |                      |
| Leistungsethos*<br>Hohes Einkommen     |                      |                      |                      | -0.202<br>(0.238)    | -0.653*<br>(0.360)   | -0.643*<br>(0.330)   |                       |                     |                      |                      |                       |                      |
| Kult. Liberalismus                     |                      |                      |                      |                      |                      |                      | -0.398***<br>(0.0803) | -0.463**<br>(0.206) | -0.529***<br>(0.105) |                      |                       |                      |
| Kult. Liberalismus*<br>Hohes Einkommen |                      |                      |                      |                      |                      |                      | -0.173<br>(0.120)     | -0.247<br>(0.252)   | 0.0182<br>(0.156)    |                      |                       |                      |
| Migration                              |                      |                      |                      |                      |                      |                      |                       |                     |                      | -1.091***<br>(0.136) | -0.662***<br>(0.0980) | -0.972***<br>(0.200) |
| Migration*<br>Hohes Einkommen          |                      |                      |                      |                      |                      |                      |                       |                     |                      | -0.616***<br>(0.215) | 0.255**<br>(0.121)    | -0.206<br>(0.284)    |
| Constant                               | -3.159***<br>(0.569) | -3.485***<br>(1.022) | -3.252***<br>(0.623) | -2.396***<br>(0.476) | -3.443***<br>(1.256) | -3.338***<br>(0.594) | -1.458***<br>(0.424)  | -2.026**<br>(1.009) | -1.649***<br>(0.490) | -0.297<br>(0.433)    | -0.754<br>(0.640)     | -0.859*<br>(0.487)   |
| Observations                           | 3,073                | 2,242                | 3,077                | 3,106                | 2,233                | 2,655                | 3,074                 | 2,241               | 2,605                | 3,110                | 2,243                 | 2,259                |

Robust standard errors in parentheses; \*\*\* p<0.01, \*\* p<0.05, \* p<0.1

**Tab. 5** Calinski-Harabasz-Index der 2-5-Clusterlösungen (Quelle: ALLBUS 2018, ESS 9, EVS 2017; eigene Berechnungen)

| Anzahl Cluster | Calinski-Harabasz pseudo F (ALLBUS 2018) | Calinski-Harabasz pseudo F (ESS 9) | Calinski-Harabasz pseudo F (EVS 2017) |
|----------------|------------------------------------------|------------------------------------|---------------------------------------|
| 2              | 112.21                                   | 37.50                              | 36.18                                 |
| 3              | 126.41                                   | 33.31                              | 36.78                                 |
| 4              | 139.66                                   | 34.52                              | 37.51                                 |
| 5              | 138.00                                   | 34.74                              | 36.77                                 |

**Tab. 6** Items zur Messung des Verhältnisses zum politischen System (Quelle: ALLBUS 2018. In Klammern wird das Skalenniveau der jeweiligen Items angegeben)

|                                              | Items                                                                                                                                                                                                                                                                                                                                                                                                                                                                           |
|----------------------------------------------|---------------------------------------------------------------------------------------------------------------------------------------------------------------------------------------------------------------------------------------------------------------------------------------------------------------------------------------------------------------------------------------------------------------------------------------------------------------------------------|
| <b>Interesse an Politik</b>                  | <p>1) Die ganze Politik ist so kompliziert, dass jemand wie ich gar nicht versteht, was vorgeht. (4)</p> <p>2) Im Allgemeinen weiß ich eher wenig über Politik (4)</p>                                                                                                                                                                                                                                                                                                          |
| <b>Politische Partizipation</b>              | <p>Was davon haben Sie selbst schon gemacht, woran waren Sie schon einmal beteiligt?</p> <p>1) Sich in Versammlungen an öffentlichen Diskussionen beteiligen (2)</p> <p>2) Mitarbeit in einer Bürgerinitiative (2)</p> <p>3) In einer Partei aktiv mitarbeiten (2)</p> <p>4) Teilnahme an einer genehmigten Demonstration (2)</p> <p>5) Sich an einer Volksabstimmung oder einem Bürgerentscheid beteiligen (2)</p> <p>6) Sich an einer Online-Protestaktion beteiligen (2)</p> |
| <b>Anti-Elite-Einstellungen</b>              | <p>1) Politiker kümmern sich nicht um meine Gedanken (4)</p> <p>2) Politiker vertreten die Interessen der Bevölkerung (4)</p> <p>3) Politiker vertreten nur die Reichen (4)</p>                                                                                                                                                                                                                                                                                                 |
| <b>Vertrauen in politische Institutionen</b> | <p>Sagen Sie mir bitte bei jeder Einrichtung oder Organisation, wie groß das Vertrauen ist, das Sie ihr entgegenbringen.</p> <p>1) Bundestag (7)</p> <p>2) Bundesregierung (7)</p> <p>3) Politische Parteien (7)</p>                                                                                                                                                                                                                                                            |

**Tab. 7** Logistische Regression mit AfD-Sympathisantinnen, Referenzkategorie ist Cluster 1 (Quelle: ALLBUS 2018, ESS 9, EVS 2017; eigene Berechnungen; marginale Effekte)

| VARIABLES                                         | EVS 2017            |                      | ESS 9               |                     | ALLBUS 2018           |                      |                       |
|---------------------------------------------------|---------------------|----------------------|---------------------|---------------------|-----------------------|----------------------|-----------------------|
|                                                   | Modell 1            | Modell 2             | Modell 1            | Modell 2            | Modell 1              | Modell 2             | Modell 3              |
| <b>Geschlecht (Ref.: Weiblich)</b>                |                     |                      |                     |                     |                       |                      |                       |
| Männlich                                          | -0.128<br>(0.114)   | -0.194*<br>(0.109)   | -0.0963<br>(0.0932) | -0.0609<br>(0.0910) | -0.0753<br>(0.0482)   | -0.113**<br>(0.0494) | -0.0615<br>(0.0470)   |
| <b>Alter (Ref.: 68+)</b>                          |                     |                      |                     |                     |                       |                      |                       |
| 53-67                                             | 0.0162<br>(0.161)   | 0.0571<br>(0.140)    | 0.00728<br>(0.129)  | -0.0162<br>(0.149)  | 0.0887<br>(0.0770)    | 0.106<br>(0.0752)    | 0.0684<br>(0.0732)    |
| 37-52                                             | -0.0810<br>(0.171)  | -0.157<br>(0.145)    | 0.0534<br>(0.141)   | -0.0228<br>(0.146)  | 0.146**<br>(0.0741)   | 0.179**<br>(0.0764)  | 0.118*<br>(0.0709)    |
| 18-36                                             | -0.107<br>(0.170)   | -0.179<br>(0.174)    | 0.171<br>(0.125)    | 0.104<br>(0.145)    | 0.155**<br>(0.0785)   | 0.146*<br>(0.0791)   | 0.101<br>(0.0781)     |
| <b>Region (Ref.: Westen)</b>                      |                     |                      |                     |                     |                       |                      |                       |
| Ostdeutschland                                    | 0.235**<br>(0.111)  | 0.289***<br>(0.0989) | 0.204**<br>(0.0851) | 0.181**<br>(0.0893) | 0.107**<br>(0.0449)   | 0.135***<br>(0.0447) | 0.0802*<br>(0.0455)   |
| <b>Stadt/Land (Ref.: Großstadt)</b>               |                     |                      |                     |                     |                       |                      |                       |
| Kleinstadt                                        | 0.0574<br>(0.119)   | 0.183<br>(0.138)     | -0.134<br>(0.159)   | -0.153<br>(0.135)   | 0.109*<br>(0.0612)    | 0.162**<br>(0.0635)  | 0.109*<br>(0.0608)    |
| Land                                              | -0.00639<br>(0.167) | 0.0303<br>(0.171)    | -0.109<br>(0.166)   | -0.156<br>(0.142)   | 0.0763<br>(0.0715)    | 0.161**<br>(0.0735)  | 0.0726<br>(0.0707)    |
| <b>Religiosität (Ref.: nicht religiös)</b>        |                     |                      |                     |                     |                       |                      |                       |
| Religiös                                          | -0.206*<br>(0.113)  | -0.105<br>(0.119)    | -0.100<br>(0.121)   | -0.0817<br>(0.112)  | -0.0851*<br>(0.0515)  | -0.101*<br>(0.0552)  | -0.0494<br>(0.0494)   |
| <b>Einkommen (Ref.: Unterschicht)</b>             |                     |                      |                     |                     |                       |                      |                       |
| Mittelschicht                                     | -0.0347<br>(0.122)  |                      | 0.0227<br>(0.110)   |                     | -0.0938*<br>(0.0520)  |                      | -0.0683<br>(0.0533)   |
| Oberschicht                                       | 0.0392<br>(0.136)   |                      | -0.288**<br>(0.136) |                     | -0.222***<br>(0.0677) |                      | -0.164**<br>(0.0680)  |
| <b>Bildung (Ref.: Hauptschule)</b>                |                     |                      |                     |                     |                       |                      |                       |
| Mittlere Reife                                    | -0.0651<br>(0.137)  |                      | -0.0332<br>(0.113)  |                     | -0.00976<br>(0.0535)  |                      | -0.000959<br>(0.0542) |
| Abitur                                            | -0.309**<br>(0.134) |                      | -0.195<br>(0.165)   |                     | -0.263***<br>(0.0652) |                      | -0.191***<br>(0.0683) |
| <b>Berufsklassen (Ref.: Obere Dienstklasse)</b>   |                     |                      |                     |                     |                       |                      |                       |
| Untere Dienstklasse                               |                     | 0.0945<br>(0.192)    |                     | 0.0853<br>(0.167)   |                       | 0.0262<br>(0.0835)   |                       |
| Kleinunternehmer                                  |                     | 0.0216<br>(0.201)    |                     | -0.225<br>(0.166)   |                       | 0.00916<br>(0.138)   |                       |
| Facharbeiter                                      |                     | 0.200<br>(0.182)     |                     | 0.265**<br>(0.133)  |                       | 0.192**<br>(0.0746)  |                       |
| Ungelernte Arbeiter                               |                     | -0.0199<br>(0.188)   |                     | 0.146<br>(0.172)    |                       | 0.280***<br>(0.0816) |                       |
| <b>Gerechter Anteil (Ref.: gerechter Anteil)</b>  |                     |                      |                     |                     |                       |                      |                       |
| Kein gerechter Anteil                             |                     |                      |                     |                     |                       |                      | 0.168***<br>(0.0432)  |
| <b>Persönliche Lage (Ref.: Keine Deprivation)</b> |                     |                      |                     |                     |                       |                      |                       |
| Subjektive Deprivation                            |                     |                      |                     |                     |                       |                      | 0.116<br>(0.0945)     |
| Observations                                      | 107                 | 95                   | 129                 | 126                 | 445                   | 416                  | 439                   |

Robust standard errors in parentheses; \*\*\* p<0.01, \*\* p<0.05, \* p<0

**Tab. 8** Ergebnisse der multinomialen logistischen Regressionen. Referenzkategorie sind Personen ohne AfD-Affinität (Quelle: ALLBUS 2018, ESS 9, EVS 2017; eigene Berechnungen; marginale Effekte)

| VARIABLES                                  | EVS 2017               |                        |                        |                        | ESS 9                  |                        |                        |                        | ALLBUS 2018            |                         |                        |                         |                        |                         |
|--------------------------------------------|------------------------|------------------------|------------------------|------------------------|------------------------|------------------------|------------------------|------------------------|------------------------|-------------------------|------------------------|-------------------------|------------------------|-------------------------|
|                                            | Modell 1               |                        | Modell 2               |                        | Modell 1               |                        | Modell 2               |                        | Modell 1               |                         | Modell 2               |                         | Modell 3               |                         |
|                                            | Cluster 1              | Cluster 2               | Cluster 1              | Cluster 2               | Cluster 1              | Cluster 2               |
| <b>Geschlecht (Ref.: Weiblich)</b>         |                        |                        |                        |                        |                        |                        |                        |                        |                        |                         |                        |                         |                        |                         |
| Männlich                                   | 0.0192***<br>(0.00681) | 0.00626<br>(0.00533)   | 0.0185***<br>(0.00692) | 0.00605<br>(0.00514)   | 0.0238***<br>(0.00870) | 0.0117<br>(0.00814)    | 0.0230**<br>(0.00969)  | 0.0117<br>(0.00866)    | 0.0349***<br>(0.00860) | 0.0302***<br>(0.0100)   | 0.0388***<br>(0.00907) | 0.0313***<br>(0.0107)   | 0.0347***<br>(0.00871) | 0.0345***<br>(0.0100)   |
| <b>Alter (Ref.: 68+)</b>                   |                        |                        |                        |                        |                        |                        |                        |                        |                        |                         |                        |                         |                        |                         |
| 53-67                                      | 0.00646<br>(0.00640)   | 0.00997*<br>(0.00536)  | 0.000650<br>(0.00677)  | 0.00548<br>(0.00679)   | 0.0131<br>(0.0117)     | 0.0133<br>(0.0110)     | 0.0150<br>(0.0110)     | 0.00949<br>(0.0119)    | -0.00107<br>(0.0116)   | 0.0368***<br>(0.0106)   | -0.00611<br>(0.0118)   | 0.0332***<br>(0.0120)   | -0.000126<br>(0.0119)  | 0.0322***<br>(0.0112)   |
| 37-52                                      | 0.0229**<br>(0.00901)  | 0.0180**<br>(0.00805)  | 0.0197**<br>(0.00904)  | 0.00723<br>(0.00749)   | 0.00920<br>(0.0114)    | 0.0126<br>(0.0122)     | 0.00941<br>(0.0105)    | 0.00861<br>(0.0125)    | 0.000756<br>(0.0119)   | 0.0763***<br>(0.0139)   | -0.00949<br>(0.0120)   | 0.0667***<br>(0.0139)   | 0.000301<br>(0.0120)   | 0.0677***<br>(0.0141)   |
| 18-36                                      | 0.0108<br>(0.00877)    | 0.00942<br>(0.00643)   | 0.00433<br>(0.00863)   | -0.00126<br>(0.00682)  | -0.00432<br>(0.00912)  | 0.0204<br>(0.0134)     | -0.00235<br>(0.00893)  | 0.0125<br>(0.0127)     | -0.00151<br>(0.0126)   | 0.0890***<br>(0.0166)   | -0.00309<br>(0.0132)   | 0.0726***<br>(0.0161)   | -0.000644<br>(0.0129)  | 0.0743***<br>(0.0161)   |
| <b>Region (Ref.: Westen)</b>               |                        |                        |                        |                        |                        |                        |                        |                        |                        |                         |                        |                         |                        |                         |
| Ostdeutschland                             | 0.00505<br>(0.00540)   | 0.0159***<br>(0.00471) | 0.00384<br>(0.00556)   | 0.0161***<br>(0.00509) | 0.0106*<br>(0.00606)   | 0.0329***<br>(0.00739) | 0.00987<br>(0.00623)   | 0.0321***<br>(0.00759) | -0.000569<br>(0.00815) | -0.0551***<br>(0.00949) | 0.00192<br>(0.00850)   | -0.0546***<br>(0.00977) | -0.00114<br>(0.00837)  | -0.0419***<br>(0.00984) |
| <b>Stadt/Land (Ref.: Großstadt)</b>        |                        |                        |                        |                        |                        |                        |                        |                        |                        |                         |                        |                         |                        |                         |
| Kleinstadt                                 | 0.00186<br>(0.00941)   | 0.0125*<br>(0.00725)   | -0.00228<br>(0.0103)   | 0.0128<br>(0.00782)    | -0.000980<br>(0.00934) | -0.00938<br>(0.0103)   | 8.18e-05<br>(0.00960)  | -0.0129<br>(0.0108)    | -0.0159<br>(0.0114)    | -0.0140<br>(0.0130)     | -0.0120<br>(0.0114)    | -0.0243<br>(0.0149)     | -0.0178<br>(0.0117)    | -0.0107<br>(0.0127)     |
| Land                                       | -0.00949<br>(0.00954)  | -0.00592<br>(0.00729)  | -0.0109<br>(0.0106)    | -0.00846<br>(0.00767)  | -0.0217**<br>(0.00861) | -0.0301**<br>(0.0119)  | -0.0216**<br>(0.00844) | -0.0333***<br>(0.0129) | -0.0160<br>(0.0130)    | -0.0423***<br>(0.0147)  | -0.00983<br>(0.0133)   | -0.0651***<br>(0.0162)  | -0.0174<br>(0.0133)    | -0.0381***<br>(0.0147)  |
| <b>Religiosität (Ref.: nicht religiös)</b> |                        |                        |                        |                        |                        |                        |                        |                        |                        |                         |                        |                         |                        |                         |
| Religiös                                   | 0.000227<br>(0.00655)  | -0.0119*<br>(0.00651)  | -0.00607<br>(0.00730)  | -0.0146**<br>(0.00677) | 0.00217<br>(0.00271)   | 0.0163***<br>(0.00466) | 0.00204<br>(0.00288)   | 0.0157***<br>(0.00477) | -0.00840<br>(0.00869)  | -0.0567***<br>(0.0134)  | -0.00761<br>(0.00905)  | -0.0589***<br>(0.0144)  | -0.00924<br>(0.00870)  | -0.0504***<br>(0.0132)  |
| <b>Einkommen (Ref.: Unterschicht)</b>      |                        |                        |                        |                        |                        |                        |                        |                        |                        |                         |                        |                         |                        |                         |
| Mittelschicht                              | -0.00159<br>(0.00721)  | -0.00244<br>(0.00620)  |                        |                        | -0.00581<br>(0.00980)  | -0.00223<br>(0.0112)   |                        |                        | 0.0121<br>(0.00966)    | -0.00884<br>(0.0133)    |                        |                         | 0.00866<br>(0.0112)    | 0.00960<br>(0.0131)     |
| Oberschicht                                | -0.00992<br>(0.00749)  | -0.00203<br>(0.00797)  |                        |                        | 0.00114<br>(0.0108)    | -0.0259**<br>(0.0111)  |                        |                        | 0.00970<br>(0.0107)    | -0.0490***<br>(0.0145)  |                        |                         | 0.00420<br>(0.0121)    | -0.0249*<br>(0.0149)    |

| VARIABLES                                         | EVS                   |                         |                      |                        | ESS 9                 |                        |                       |                       | ALLBUS 2018           |                       |                      |                       |                       |                        |
|---------------------------------------------------|-----------------------|-------------------------|----------------------|------------------------|-----------------------|------------------------|-----------------------|-----------------------|-----------------------|-----------------------|----------------------|-----------------------|-----------------------|------------------------|
|                                                   | Modell 1              |                         | Modell 2             |                        | Modell 1              |                        | Modell 2              |                       | Modell 1              |                       | Modell 2             |                       | Modell 3              |                        |
|                                                   | Cluster 1             | Cluster 2               | Cluster 1            | Cluster 2              | Cluster 1             | Cluster 2              | Cluster 1             | Cluster 2             | Cluster 1             | Cluster 2             | Cluster 1            | Cluster 2             | Cluster 1             | Cluster 2              |
| <b>Bildung (Ref.: Hauptschule)</b>                |                       |                         |                      |                        |                       |                        |                       |                       |                       |                       |                      |                       |                       |                        |
| Mittlere Reife                                    | -0.00156<br>(0.00862) | -0.00711<br>(0.00869)   |                      |                        | 0.00611<br>(0.00918)  | 0.000268<br>(0.0122)   |                       |                       | -0.000481<br>(0.0101) | -0.0277<br>(0.0179)   |                      |                       | 0.000354<br>(0.0105)  | -0.0195<br>(0.0166)    |
| Abitur                                            | -0.00419<br>(0.00946) | -0.0225***<br>(0.00810) |                      |                        | -0.00633<br>(0.00895) | -0.0357***<br>(0.0112) |                       |                       | 0.00524<br>(0.0113)   | -0.104***<br>(0.0170) |                      |                       | 0.00532<br>(0.0117)   | -0.0867***<br>(0.0157) |
| <b>Berufsklassen (Ref.: Obere Dienstklasse)</b>   |                       |                         |                      |                        |                       |                        |                       |                       |                       |                       |                      |                       |                       |                        |
| Untere Dienstklasse                               |                       |                         | 0.00238<br>(0.00686) | 0.00759<br>(0.00511)   |                       |                        | 0.00108<br>(0.0117)   | 0.00891<br>(0.0118)   |                       |                       | 0.0146<br>(0.0113)   | 0.0268**<br>(0.0122)  |                       |                        |
| Kleinunternehmer                                  |                       |                         | 0.0235*<br>(0.0139)  | 0.0178*<br>(0.0108)    |                       |                        | 0.0195<br>(0.0155)    | -0.00856<br>(0.0104)  |                       |                       | 0.0217<br>(0.0226)   | 0.0188<br>(0.0223)    |                       |                        |
| Facharbeiter                                      |                       |                         | 0.00292<br>(0.00673) | 0.0160***<br>(0.00569) |                       |                        | -0.00154<br>(0.00880) | 0.0344***<br>(0.0113) |                       |                       | 0.00647<br>(0.0106)  | 0.0709***<br>(0.0138) |                       |                        |
| Ungelernte Arbeiter                               |                       |                         | 0.0207<br>(0.0145)   | 0.0186*<br>(0.0105)    |                       |                        | 0.00889<br>(0.0161)   | 0.0166<br>(0.0130)    |                       |                       | -0.00489<br>(0.0127) | 0.125***<br>(0.0214)  |                       |                        |
| <b>Gerechter Anteil (Ref.: gerechter Anteil)</b>  |                       |                         |                      |                        |                       |                        |                       |                       |                       |                       |                      |                       |                       |                        |
| Kein gerechter Anteil                             |                       |                         |                      |                        |                       |                        |                       |                       |                       |                       |                      |                       | -0.00688<br>(0.00879) | 0.0669***<br>(0.0109)  |
| <b>Persönliche Lage (Ref.: Keine Deprivation)</b> |                       |                         |                      |                        |                       |                        |                       |                       |                       |                       |                      |                       |                       |                        |
| Subjektive Deprivation                            |                       |                         |                      |                        |                       |                        |                       |                       |                       |                       |                      |                       | -0.0195<br>(0.0211)   | 0.0135<br>(0.0160)     |
| Observations                                      | 2,917                 | 2,917                   | 2,636                | 2,636                  | 2,233                 | 2,233                  | 2,142                 | 2,142                 | 3,096                 | 3,096                 | 2,844                | 2,844                 | 3,040                 | 3,040                  |

Robust standard errors in parentheses; \*\*\* p<0.01, \*\* p<0.05, \* p<0
